# Supplementary material for: Bacterial identification of the vaginal microbiota in Ecuadorian pregnant teenagers: an exploratory analysis
Source: PeerJ. 2018 Feb 21;6:e4317. doi: 10.7717/peerj.4317 (PMC5826987; doi:10.7717/peerj.4317)
Supplement: File S1 [file peerj-06-4317-s001.xlsx]

## Sheet: BASE DE DATOS PROY. SECR. VAG
# samples	code1	code2	age	agecode	civilstatus	civilstatuscode	condom	condomcode	sexualpartners	sexualpartnercode	pH	Lactobacillus sp.	L.iners	L.crispatus	L.gasseri	L.jensenii	L.acidophilus	Gardnerella vaginalis	Mobiluncus mulieris	Atopobium vaginae
1	001	V001	16 to 17 years 11 months	2	Free union	1	No	0	1	0	6	1	1	1	1	0	1	1	1	1
2	002	V002	16 to 17 years 11 months	2	Single	0	No	0	1	0	5	1	1	1	1	0	1	1	1	1
3	003	V003	Over 18 years	3	Single	0	No	0	1	0	5	1	1	1	1	1	1	1	0	1
4	004	V004	16 to 17 years 11 months	2	Single	0	No	0	1	0	4	1	1	1	0	1	1	0	1	1
5	005	V005	16 to 17 years 11 months	2	Single	0	Occasionally	1	3	2	-	1	1	1	0	1	0	1	0	1
6	006	V006	16 to 17 years 11 months	2	Single	0	No	0	1	0	5	1	1	1	1	1	1	0	0	1
7	007	V007	16 to 17 years 11 months	2	Free union	1	Occasionally	1	2	1	-	1	1	1	1	1	1	1	1	1
8	008	V008	16 to 17 years 11 months	2	Single	0	Yes	2	1	0	6	1	1	1	1	0	1	1	0	1
9	009	V009	16 to 17 years 11 months	2	Free union	1	No	0	1	0	6	1	1	1	1	1	1	1	0	1
10	010	V010	Over 18 years	3	Single	0	No	0	1	0	6	1	1	1	0	0	0	1	0	1
11	011	V011	14 to 15 years 11 months	1	Single	0	No	0	2	1	5	1	1	1	0	0	0	1	0	1
12	012	V012	Over 18 years	3	Free union	1	Occasionally	1	2	1	5	1	1	1	1	0	1	1	1	1
13	013	V013	16 to 17 years 11 months	2	Single	0	Occasionally	1	1	0	5	1	1	1	0	1	1	1	1	1
14	014	V014	Over 18 years	3	Free union	1	No	0	2	1	6	1	0	1	0	0	1	1	1	1
16	016	V016	14 to 15 years 11 months	1	Single	0	No	0	2	1	5	1	1	1	0	1	0	1	0	1
17	017	V017	16 to 17 years 11 months	2	Single	0	Occasionally	1	1	0	6	1	1	1	0	0	1	1	1	1
18	018	V018	Over 18 years	3	Free union	1	No	0	1	0	5	1	1	1	0	1	0	1	0	1
19	019	V019	16 to 17 years 11 months	2	Free union	1	Occasionally	1	1	0	7	1	1	1	0	1	1	1	0	1
20	020	V020	12 to 13 years 11 months	0	Single	0	Occasionally	1	1	0	5	1	1	1	1	1	1	1	0	1
21	021	V021	16 to 17 years 11 months	2	Single	0	Occasionally	1	1	0	5	1	1	1	0	1	1	1	1	1
22	022	V022	16 to 17 years 11 months	2	Single	0	No	0	2	1	5	1	0	1	0	1	1	0	1	1
23	023	V023	16 to 17 years 11 months	2	Single	0	No	0	1	0	6	1	1	1	1	1	1	1	0	1
24	024	V024	14 to 15 years 11 months	1	Single	0	Occasionally	1	1	0	5	1	1	1	1	1	1	1	1	1
25	025	V025	16 to 17 years 11 months	2	Single	0	No	0	1	0	5	1	1	1	1	1	1	1	1	1
26	026	V026	16 to 17 years 11 months	2	Single	0	Yes	2	2	1	4	1	1	1	0	0	1	0	1	1
27	027	V027	16 to 17 years 11 months	2	Single	0	Occasionally	1	2	1	-	1	1	1	1	1	1	1	0	1
28	028	V028	Over 18 years	3	Single	0	No	0	1	0	6	1	1	1	0	0	0	1	1	1
29	029	V029	Over 18 years	3	Single	0	Yes	2	2	1	5	1	1	1	0	1	1	1	0	1
30	030	V030	14 to 15 years 11 months	1	Single	0	No	0	1	0	5	1	1	1	1	1	1	1	1	1
31	031	V031	16 to 17 years 11 months	2	Single	0	No	0	2	1	5	1	1	1	0	1	1	1	0	1
32	032	V032	Over 18 years	3	Single	0	Occasionally	1	1	0	5	1	1	1	1	1	1	1	0	1
33	033	V033	Over 18 years	3	Free union	1	No	0	2	1	5	1	1	1	0	1	1	1	0	1
34	034	V034	Over 18 years	3	Single	0	Occasionally	1	1	0	5	1	1	1	1	1	1	1	0	1
35	035	V035	16 to 17 years 11 months	2	Single	0	Occasionally	1	1	0	4	1	1	1	0	1	1	1	1	1
36	036	V036	Over 18 years	3	Single	0	No	0	1	0	6	1	1	1	0	1	1	1	0	1
37	037	V037	14 to 15 years 11 months	1	Free union	1	Occasionally	1	3	2	5	1	1	1	1	1	1	1	0	1
39	039	V039	16 to 17 years 11 months	2	Single	0	No	0	1	0	5	1	1	0	1	1	1	0	0	1
40	040	V040	16 to 17 years 11 months	2	Free union	1	Yes	2	1	0	6	1	1	1	1	1	1	1	0	1
41	041	V041	16 to 17 years 11 months	2	Free union	1	Occasionally	1	1	0	4	1	0	1	1	1	1	1	0	1
42	042	V042	16 to 17 years 11 months	2	Free union	1	No	0	1	0	6	1	1	1	1	1	1	1	1	1
43	043	V043	16 to 17 years 11 months	2	Free union	1	No	0	1	0	5	1	1	1	1	1	1	0	0	1
44	044	V044	Over 18 years	3	Single	0	Yes	2	1	0	4	1	1	1	0	1	1	1	0	1
45	045	V045	16 to 17 years 11 months	2	Free union	1	No	0	1	0	4	1	1	1	1	1	1	1	0	1
47	047	V047	16 to 17 years 11 months	2	Single	0	Occasionally	1	1	0	6	1	1	1	1	1	1	1	0	1
48	048	V048	14 to 15 years 11 months	1	Single	0	No	0	1	0	5	1	1	1	0	0	0	1	0	1
49	049	V049	Over 18 years	3	Free union	1	Occasionally	1	1	0	6	1	0	1	1	1	1	1	0	1
50	050	V050	Over 18 years	3	Single	0	No	0	1	0	4	1	1	1	1	1	1	1	0	1
51	051	V051	Over 18 years	3	Single	0	Occasionally	1	Over 3	3	6	1	1	1	1	1	1	1	1	1
52	052	V052	Over 18 years	3	Free union	1	No	0	1	0	5	1	1	1	1	1	1	1	0	1
53	053	V053	14 to 15 years 11 months	1	Single	0	Occasionally	1	1	0	5	1	0	1	1	0	0	1	1	1
54	054	V054	16 to 17 years 11 months	2	Single	0	Occasionally	1	1	0	4	1	1	1	0	1	1	1	1	1
55	055	V055	14 to 15 years 11 months	1	Single	0	Occasionally	1	1	0	5	1	1	0	0	1	1	1	0	1
56	056	V056	16 to 17 years 11 months	2	Single	0	No	0	1	0	5	1	1	1	0	1	1	1	1	1
57	057	V057	Over 18 years	3	Single	0	No	0	1	0	4	1	1	1	1	1	1	1	0	1
58	058	V058	Over 18 years	3	Married	2	Occasionally	1	1	0	4	1	1	1	1	1	1	1	0	1
59	059	V059	14 to 15 years 11 months	1	Single	0	No	0	1	0	6	1	1	0	0	1	1	1	1	1
60	060	V060	16 to 17 years 11 months	2	Free union	1	Occasionally	1	1	0	6	1	1	1	1	0	1	1	1	1
61	061	V061	16 to 17 years 11 months	2	Single	0	Occasionally	1	1	0	5	1	1	1	1	1	1	1	0	1
62	062	V062	16 to 17 years 11 months	2	Single	0	Occasionally	1	2	1	5	1	1	1	1	1	1	1	0	1
63	063	V063	16 to 17 years 11 months	2	Single	0	Occasionally	1	2	1	5	1	0	1	1	1	1	1	0	1
64	064	V064	16 to 17 years 11 months	2	Single	0	No	0	1	0	4	1	1	1	1	1	1	1	0	1
65	065	V065	14 to 15 years 11 months	1	Free union	1	No	0	1	0	6	1	1	1	1	1	0	1	1	1
66	066	V066	16 to 17 years 11 months	2	Single	0	No	0	1	0	6	1	1	1	1	1	1	1	1	1
67	067	V067	16 to 17 years 11 months	2	Free union	1	No	0	1	0	4	1	1	1	1	0	1	1	0	1
69	069	V069	16 to 17 years 11 months	2	Single	0	Occasionally	1	2	1	5	1	1	1	0	1	1	1	0	1
70	070	V070	16 to 17 years 11 months	2	Single	0	No	0	1	0	6	1	1	0	0	1	1	1	1	1
71	071	V071	Over 18 years	3	Single	0	Occasionally	1	1	0	6	1	1	1	0	1	1	1	0	1
72	072	V072	16 to 17 years 11 months	2	Free union	1	No	0	1	0	5	1	1	1	0	0	1	1	0	1
73	073	V073	16 to 17 years 11 months	2	Single	0	No	0	1	0	5	1	1	0	0	0	1	1	0	1
74	074	V074	14 to 15 years 11 months	1	Single	0	Occasionally	1	1	0	5	1	1	1	0	1	1	1	0	1
75	075	V075	16 to 17 years 11 months	2	Single	0	Occasionally	1	1	0	5	1	1	0	0	1	1	1	0	1
76	076	V076	16 to 17 years 11 months	2	Single	0	No	0	1	0	5	1	1	0	0	1	1	1	1	1
77	077	V077	12 to 13 years 11 months	0	Single	0	No	0	1	0	7	1	1	1	0	1	1	1	1	1
78	078	V078	Over 18 years	3	Free union	1	No	0	1	0	6	1	0	1	0	0	0	1	1	1
79	079	V079	14 to 15 years 11 months	1	Single	0	Occasionally	1	2	1	5	1	1	1	1	1	1	1	0	1
80	080	V080	Over 18 years	3	Single	0	Occasionally	1	2	1	5	1	1	1	1	1	1	1	0	1
81	081	V081	16 to 17 years 11 months	2	Free union	1	Occasionally	1	1	0	5	1	1	1	1	1	1	1	0	1
82	082	V082	14 to 15 years 11 months	1	Free union	1	Occasionally	1	1	0	5	1	1	1	0	1	0	1	1	1
83	083	V083	16 to 17 years 11 months	2	Free union	1	No	0	1	0	5	1	1	1	1	1	1	1	0	1
84	084	V084	16 to 17 years 11 months	2	Single	0	No	0	2	1	5	1	1	1	0	1	1	1	0	1
85	085	V085	14 to 15 years 11 months	1	Single	0	No	0	1	0	5	1	1	1	1	1	1	1	0	1
86	086	V086	16 to 17 years 11 months	2	Free union	1	Occasionally	1	2	1	6	1	1	1	1	1	1	1	0	1
87	087	V087	16 to 17 years 11 months	2	Single	0	Yes	2	1	0	4	1	1	1	1	1	1	1	0	1
88	088	V088	Over 18 years	3	Single	0	No	0	1	0	5	1	0	1	1	1	1	1	0	1
89	089	V089	16 to 17 years 11 months	2	Single	0	No	0	1	0	5	1	1	1	1	1	1	1	0	1
90	090	V090	14 to 15 years 11 months	1	Single	0	No	0	1	0	6	1	1	1	1	1	1	1	0	1
91	091	V091	16 to 17 years 11 months	2	Single	0	No	0	1	0	6	1	1	1	0	1	1	1	1	1
92	092	V092	Over 18 years	3	Free union	1	No	0	1	0	5	1	1	1	1	1	1	1	0	1
93	093	V093	16 to 17 years 11 months	2	Single	0	Occasionally	1	1	0	6	1	0	1	0	1	0	1	1	1
94	094	V094	16 to 17 years 11 months	2	Free union	1	Occasionally	1	1	0	5	1	1	1	1	1	1	1	0	1
95	095	V095	14 to 15 years 11 months	1	Single	0	No	0	2	1	6	1	1	1	1	0	1	1	1	1
96	096	V096	Over 18 years	3	Free union	1	No	0	1	0	5	1	1	1	1	1	1	1	0	1
98	098	V098	16 to 17 years 11 months	2	Free union	1	Occasionally	1	1	0	5	1	1	1	1	1	1	1	0	1
99	099	V099	Over 18 years	3	Single	0	Occasionally	1	1	0	5	1	1	1	0	1	1	1	0	1
100	100	V100	Over 18 years	3	Single	0	No	0	1	0	6	1	0	1	0	1	1	1	0	1
